# Supplementary material for: Nutritional values of wild edible freshwater macrophytes
Source: PeerJ. 2023 Jul 11;11:e15496. doi: 10.7717/peerj.15496 (PMC10348304; doi:10.7717/peerj.15496)
Supplement: Supplemental Information 1 [file peerj-11-15496-s001.xlsx]

## Sheet: macro-micro nutrients
	Macronutrient					Micronutrient
Species	N	P	K	C a	Mg	Cu	Mn	Zn	Fe
Eichornia crassipes	15880	748	12212	11360	1680	20	404	120	300
(leaves)	16720	772	13084	11460	1748	20	412	152	392
	15880	728	11716	10764	1644	36	388	196	460
	11240	824	27000	13736	1604	32	380	144	412
Eichornia crassipes	10040	548	15560	11516	1560	28	492	180	292
(petiole)	10040	580	15928	11844	1624	24	504	156	308
	10200	568	16092	11776	1588	24	500	156	316
	9040	488	14800	12452	1744	32	472	164	540
mean	12380	657	15799	11863.5	1649	27	444	158.5	377.5	mean
se	1129.91	44.0633	1708.85	316.414	24.6779	2.10442	18.7464	8.0689	31.7754	se
min	10040	488	11716	10764	1560	20	380	120	292	min
max	16720	824	27000	13736	1748	36	504	196	540	max
Limnocharis flava	30360	2300	19628	9204	1144	20	136	116	424
(leaves)	30320	2280	17944	9100	1136	16	136	112	296
	30360	2304	17244	9284	1128	16	132	96	308
	35680	3816	66000	8860	1608	16	204	112	220
Limnocharis flava	17360	1964	18288	7100	1008	12	100	100	292
(petiole)	17320	1972	18212	7024	980	16	92	92	268
	17400	2000	18492	7788	988	16	96	128	284
	12960	5240	90400	6172	1596	16	260	124	420
mean	23970	2734.5	33276	8066.5	1198.5	16	144.5	110	314	mean
se	3021.97	417.099	10073.4	425.978	91.2107	0.755929	20.8181	4.59814	25.3659	se
min	12960	1964	17244	6172	980	12	92	92	220	min
max	35680	5240	90400	9284	1608	20	260	128	424	max
Neptunia oleracea (all)	38320	1924	11008	3432	2488	20	124	108	984
	41600	2136	11440	3552	2592	28	152	120	1432
	40400	2080	11280	3416	2576	16	124	100	1204
	41200	2960	11120	3932	2808	16	184	100	1508
mean	40380	2275	11212	3583	2616	20	146	107	1282	mean
se	730.571	232.697	94.2903	120.226	67.9608	2.82843	14.2829	4.72582	118.485	se
min	38320	1924	11008	3416	2488	16	124	100	984	min
max	41600	2960	11440	3932	2808	28	184	120	1508	max

## Sheet: Figure 2 & 3
		mg/kg
	Species	N	P	K	Ca	Mg
	E. crassipes	12380	657	15799	11863.5	1649
	L. flava	23970	2734.5	33276	8066.5	1198.5
	N. oleracea	40380	2275	11212	3583	2616
		Error bar
		1129.9	44.1	1708.9	316.4	24.7
		3022	417.1	10073.4	426	91.2
		730.6	232.7	94.3	120.2	68
	Species	Cu	Mn	Zn	Fe
	E. crassipes	27	444	158.5	377.5
	L. flava	16	144.5	110	314
	N. oleracea	20	146	107	1282
		Error bar
		2.1	18.7	8.1	31.8
		0.8	20.8	4.6	25.4
		2.8	14.3	4.7	118.5
