# Supplementary material for: Nutritional values of wild edible freshwater macrophytes
Source: PeerJ. 2023 Jul 11;11:e15496. doi: 10.7717/peerj.15496 (PMC10348304; doi:10.7717/peerj.15496)
Supplement: Supplemental Information 2 [file peerj-11-15496-s002.xlsx]

## Sheet: raw data proximate
		%					cal/g
		Moisture	Ash	Crude lipid	Crude fiber	Crude protein	Energy	Carbohydrate
1	Eichornia crassipes	8.8	12.5913	1.61996	20.161	11.7076	3481.9	53.9201
2		7.9	12.7168	2.20157	20.8395	11.3499	3374.7	52.8922
3		8.55	12.6421	2.39375	20.6467	11.3517	3457.8	52.9658
4		8.2	11.9294	1.85728	20.4965	11.6497	3466.4	54.0671
5		12.2	14.0493	0.649705	22.5791	7.8755	3405.4	54.8464
6		11.9	14.1253	0.556328	21.9068	7.5758	3368.1	55.8357
7		12.5	14.1389	0.640612	21.6402	7.5277	3253.2	56.0526
8		12.7	13.6241	1.51258	22.4618	7.6375	3353.7	54.764
	mean	10.3438	13.2272	1.42897	21.3414	9.58442	3395.15	54.418
	se	0.758725	0.30363	0.258598	0.328362	0.731791	26.6089	0.418178
	min	7.9	11.9294	0.556328	20.161	7.5277	3253.2	52.8922
	max	12.7	14.1389	2.39375	22.5791	11.7076	3481.9	56.0526
1	Limnocharis flava	7.1	16.027	8.0733	12.4464	21.6044	3870.7	41.8489
2		6.73	15.9502	7.86627	13.4695	22.0928	3898.2	40.6212
3		6.77	15.7806	8.02139	11.4812	21.872	3905.7	42.8448
4		6.6	15.6982	7.81632	11.9939	21.9947	3860	42.4969
5		9	20.7148	2.61882	17.0986	11.2816	3073.8	48.2862
6		9	20.6924	4.24096	19.5014	11.338	3205	44.2272
7		9.7	20.7459	3.63372	19.0546	11.2651	3086.3	45.3006
8		9	20.8342	3.72849	17.6278	11.2125	2996.1	46.597
	mean	7.9875	18.3054	5.74991	15.3342	16.5826	3486.97	44.0279
	se	0.458736	0.923543	0.844646	1.17564	2.00699	151.336	0.911145
	min	6.6	15.6982	2.61882	11.4812	11.2125	2996.1	40.6212
	max	9.7	20.8342	8.0733	19.5014	22.0928	3905.7	48.2862
1	Neptunia oleracea	10.95	7.39895	3.125	9.02035	29.3153	4252.5	51.1404
2		11.5	7.51107	3.64353	8.47822	29.6191	4353.1	50.7481
3		11.48	7.46052	3.55404	9.39232	29.6401	4203.8	49.953
4		9.33	7.31469	3.57834	8.0396	29.8659	4269.2	51.2015
	mean	10.815	7.42131	3.47523	8.73262	29.6101	4269.65	50.7607
	se	0.511118	0.0422907	0.11826	0.297627	0.113035	31.0838	0.287365
	min	9.33	7.31469	3.125	8.0396	29.3153	4203.8	49.953
	max	11.5	7.51107	3.64353	9.39232	29.8659	4353.1	51.2015

## Sheet: Compare Proximate
Bil	SPECIES	Moisture	Ash	Crude lipid	Crude fiber	Crude protein	Carbohydrate
1	Eichhornia crassipes	10.34	13.23	1.43	21.34	9.58	54.42
2	Limnocharis flava	7.99	18.31	5.75	15.33	16.58	44.03
3	Neptunia oleracea	10.82	7.42	3.48	8.73	29.61	50.76
4	Limnocharis flava	79.34	0.79	1.22	3.81	0.28	14.56
5	Neptunia oleracea	86.26	1.05	0.25	2.3	3.23	6.91
6	Ipomea aquatica	72.83	10.83	11	17.67	6.3	54.2
7	Ipomea aquatica	51.36	2.75	0.81	1.2	1.7	42.18
8	Momordica balsamina	71	18	2.66	29	11.29	39.05
9	Amaranthus hybridus	59.3	4.1	1.2	3.4	4.6	27.4
10	Lycopersicon esculentum	56.4	3	1.6	2.6	3.2	33.2
11	Telfaria occidentalis	58.7	3.1	1.4	2.6	3.2	32
12	Basella alba	54.8	3.1	0.9	2.7	4.2	34.3
13	Myrianthus arboreus	83.9	16.4	13.1	11.6	18.75	40.15
14	Moringa oleifera	76.53	7.13	2.23	19.25	27.51	43.88
15	Zingiber officinalis	16.1	9.6	12.1	4.5	14.9	53.1
16	Piper quineense	55.3	4.5	11.7	8.7	26.6	38.9
17	Fagonia cretica	9.3	16	10.4	25.1	7.7	31.5
18	Tribulus terrestris	8.7	15.7	9.9	15.5	13.1	37.2
19	Chrozophora tinctoria	9.7	16	13	6.7	10.5	44.1
20	Ricinus communis	9.8	16.2	12.9	23.8	16.2	21.1

## Sheet: PCA_HID
	1.28123	0.119479	-0.512032	-1.96995	-0.0492979	-1.94786	-0.47091	3.85889	0.593813	2.62709
	1.80144	-0.029349	-0.501063	-0.570187	-0.469809	2.65063	-1.90595	-0.213541	-0.452015	0.801797
	1.09266	2.05576	0.19677	-0.35343	-1.31403	2.14382	-0.312863	-0.532349	3.96873	1.9145
	-3.00161	-0.848281	0.0639311	0.382614	-0.169599	2.15544	-2.57957	1.96249	-1.98576	-0.427198
	-3.31329	-1.01284	0.390265	0.673683	-0.61482	1.87689	2.41432	2.78634	1.19329	-2.78001
	0.754372	-0.0231799	0.528887	-0.144948	1.90416	1.80763	3.22749	-0.130478	-2.27533	2.78053
	-1.80302	0.740971	-0.732164	-0.64288	0.499342
	1.00773	-1.48749	1.44066	-1.36054	0.363979
	-1.95	-0.0820524	-0.241865	-0.0675811	-0.141485
	-1.90454	0.249849	-0.449832	-0.209562	0.155862
	-1.97601	0.17886	-0.385634	-0.19008	0.131338
	-1.85608	0.360609	-0.412527	-0.34117	0.0638566
	1.08177	-0.103499	1.26542	1.23769	1.06839
	0.347	0.822565	2.23338	-0.560748	-0.547142
	1.16667	1.37494	-0.962912	0.668494	0.520286
	0.499658	1.23667	1.01145	1.46101	-0.339591
	1.72198	-1.61957	-0.647006	-0.0441483	-0.247588
	1.58949	-0.466252	-0.745443	0.246642	-0.298609
	1.52162	0.187262	-1.34511	0.795682	0.498412
	1.93895	-1.65446	-0.195182	0.98941	-1.01365

## Sheet: Figure 4 PCA
	XLSTAT 2016.02.28451 - Principal Component Analysis (PCA) - Start time: 9/5/2022 at 10:49:39 PM
	Observations/variables table: Workbook = PCA proximate Mek-050922.xlsx / Sheet = Compare Proximate / Range = 'Compare Proximate'!$C$3:$H$23 / 20 rows and 6 columns
	Observation labels: Workbook = PCA proximate Mek-050922.xlsx / Sheet = Compare Proximate / Range = 'Compare Proximate'!$B$3:$B$23 / 20 rows and 1 column
	PCA type: Pearson (n)
	Filter factors: Maximum number = 5
	Type of biplot: Distance biplot / Coefficient = Automatic
	Summary statistics:
	Variable	Observations	Obs. with missing data	Obs. without missing data	Minimum	Maximum	Mean	Std. deviation
	Moisture	20	0	20	7.99	86.26	44.4235	30.1308
	Ash	20	0	20	0.79	18.31	9.3605	6.33167
	Crude lipid	20	0	20	0.25	13.1	5.8515	5.13467
	Crude fiber	20	0	20	1.2	29	11.2915	8.90345
	Crude protein	20	0	20	0.28	29.61	11.4515	8.89129
	Carbohydrate	20	0	20	6.91	54.42	37.147	12.7116
	Correlation matrix (Pearson (n)):
	Variables	Moisture	Ash	Crude lipid	Crude fiber	Crude protein	Carbohydrate
	Moisture	1	-0.525092	-0.377853	-0.268974	-0.248923	-0.365999
	Ash	-0.525092	1	0.61556	0.767182	0.339393	0.380728
	Crude lipid	-0.377853	0.61556	1	0.321609	0.399341	0.272998
	Crude fiber	-0.268974	0.767182	0.321609	1	0.346829	0.237485
	Crude protein	-0.248923	0.339393	0.399341	0.346829	1	0.431394
	Carbohydrate	-0.365999	0.380728	0.272998	0.237485	0.431394	1
	Values in bold are different from 0 with a significance level alpha=0.05
	Principal Component Analysis:
	Eigenvalues:
		F1	F2	F3	F4	F5	F6
	Eigenvalue	3.00755	0.934999	0.777031	0.675996	0.484154	0.120266
	Variability (%)	50.1259	15.5833	12.9505	11.2666	8.06924	2.00444
	Cumulative %	50.1259	65.7092	78.6597	89.9263	97.9956	100
	Eigenvectors:
		F1	F2	F3	F4	F5	F6
	Moisture	-0.375896	-0.0908759	0.744686	0.114594	0.506974	0.160416
	Ash	0.511517	-0.367808	-0.041209	-0.0872295	0.15473	0.754863
	Crude lipid	0.413713	-0.0603762	-0.102732	0.765883	0.369458	-0.302599
	Crude fiber	0.415955	-0.497803	0.37872	-0.383211	-0.0824405	-0.531128
	Crude protein	0.362201	0.465915	0.537707	0.230281	-0.536485	0.147512
	Carbohydrate	0.348834	0.622839	-0.0251796	-0.439092	0.536585	-0.0950037
	Factor loadings:
		F1	F2	F3	F4	F5
	Moisture	-0.65189	-0.0878728	0.656436	0.0942177	0.352758
	Ash	0.887088	-0.355654	-0.0363254	-0.0717192	0.107663
	Crude lipid	0.717473	-0.0583809	-0.0905579	0.629701	0.257074
	Crude fiber	0.721362	-0.481353	0.33384	-0.315072	-0.0573631
	Crude protein	0.62814	0.450518	0.473985	0.189335	-0.373293
	Carbohydrate	0.604959	0.602257	-0.0221957	-0.361017	0.373363
	Correlations between variables and factors:
		F1	F2	F3	F4	F5
	Moisture	-0.65189	-0.0878728	0.656436	0.0942177	0.352758
	Ash	0.887088	-0.355654	-0.0363254	-0.0717192	0.107663
	Crude lipid	0.717473	-0.0583809	-0.0905579	0.629701	0.257074
	Crude fiber	0.721362	-0.481353	0.33384	-0.315072	-0.0573631
	Crude protein	0.62814	0.450518	0.473985	0.189335	-0.373293
	Carbohydrate	0.604959	0.602257	-0.0221957	-0.361017	0.373363
	Contribution of the variables (%):
		F1	F2	F3	F4	F5
	Moisture	14.1298	0.825842	55.4557	1.31317	25.7022
	Ash	26.165	13.5283	0.169818	0.760898	2.39415
	Crude lipid	17.1158	0.364528	1.05539	58.6577	13.65
	Crude fiber	17.3019	24.7808	14.3429	14.6851	0.679644
	Crude protein	13.119	21.7076	28.9128	5.30295	28.7816
	Carbohydrate	12.1686	38.7929	0.0634014	19.2802	28.7924
	Squared cosines of the variables:
		F1	F2	F3	F4	F5
	Moisture	0.42496	0.00772162	0.430908	0.00887698	0.124439
	Ash	0.786926	0.126489	0.00131954	0.00514364	0.0115914
	Crude lipid	0.514768	0.00340833	0.00820073	0.396524	0.0660868
	Crude fiber	0.520363	0.2317	0.111449	0.0992706	0.00329052
	Crude protein	0.39456	0.202966	0.224662	0.0358477	0.139348
	Carbohydrate	0.365976	0.362713	0.000492649	0.130333	0.1394
	Values in bold correspond for each variable to the factor for which the squared cosine is the largest
	Factor scores:
	Observation	F1	F2	F3	F4	F5
	Eichhornia crassipes	1.28123	0.119479	-0.512032	-1.96995	-0.0492979
	Limnocharis flava	1.80144	-0.029349	-0.501063	-0.570187	-0.469809
	Neptunia oleracea	1.09266	2.05576	0.19677	-0.35343	-1.31403
	Limnocharis flava	-3.00161	-0.848281	0.0639311	0.382614	-0.169599
	Neptunia oleracea	-3.31329	-1.01284	0.390265	0.673683	-0.61482
	Ipomea aquatica	0.754372	-0.0231799	0.528887	-0.144948	1.90416
	Ipomea aquatica	-1.80302	0.740971	-0.732164	-0.64288	0.499342
	Momordica balsamina	1.00773	-1.48749	1.44066	-1.36054	0.363979
	Amaranthus hybridus	-1.95	-0.0820524	-0.241865	-0.0675811	-0.141485
	Lycopersicon esculentum	-1.90454	0.249849	-0.449832	-0.209562	0.155862
	Telfaria occidentalis	-1.97601	0.17886	-0.385634	-0.19008	0.131338
	Basella alba	-1.85608	0.360609	-0.412527	-0.34117	0.0638566
	Myrianthus arboreus	1.08177	-0.103499	1.26542	1.23769	1.06839
	Moringa oleifera	0.347	0.822565	2.23338	-0.560748	-0.547142
	Zingiber officinalis	1.16667	1.37494	-0.962912	0.668494	0.520286
	Piper quineense	0.499658	1.23667	1.01145	1.46101	-0.339591
	Fagonia cretica	1.72198	-1.61957	-0.647006	-0.0441483	-0.247588
	Tribulus terrestris	1.58949	-0.466252	-0.745443	0.246642	-0.298609
	Chrozophora tinctoria	1.52162	0.187262	-1.34511	0.795682	0.498412
	Ricinus communis	1.93895	-1.65446	-0.195182	0.98941	-1.01365
	Contribution of the observations (%):
		F1	F2	F3	F4	F5
	Eichhornia crassipes	2.72903	0.076338	1.68704	28.7035	0.0250982
	Limnocharis flava	5.39506	0.00460622	1.61554	2.4047	2.27944
	Neptunia oleracea	1.98485	22.5998	0.249144	0.923916	17.832
	Limnocharis flava	14.9784	3.84803	0.0263	1.0828	0.297053
	Neptunia oleracea	18.2505	5.48581	0.980053	3.35689	3.90375
	Ipomea aquatica	0.946081	0.00287329	1.79994	0.1554	37.4449
	Ipomea aquatica	5.40455	2.93604	3.44944	3.05693	2.57503
	Momordica balsamina	1.68829	11.8322	13.3554	13.6915	1.36817
	Amaranthus hybridus	6.32155	0.0360032	0.376423	0.0337813	0.206733
	Lycopersicon esculentum	6.03029	0.33382	1.30206	0.324827	0.25088
	Telfaria occidentalis	6.49137	0.171074	0.956934	0.267238	0.178143
	Basella alba	5.72732	0.695393	1.09505	0.86093	0.0421112
	Myrianthus arboreus	1.94548	0.057284	10.3039	11.3306	11.7881
	Moringa oleifera	0.200178	3.61825	32.0964	2.32574	3.09162
	Zingiber officinalis	2.26285	10.1095	5.9663	3.30537	2.79557
	Piper quineense	0.415053	8.17842	6.583	15.7881	1.19096
	Fagonia cretica	4.92959	14.0268	2.69369	0.0144163	0.63306
	Tribulus terrestris	4.2002	1.16252	3.57569	0.449946	0.920859
	Chrozophora tinctoria	3.84917	0.187525	11.6426	4.6828	2.56545
	Ricinus communis	6.25013	14.6377	0.245138	7.24067	10.6111
	Squared cosines of the observations:
		F1	F2	F3	F4	F5
	Eichhornia crassipes	0.280526	0.00243951	0.0448038	0.663177	0.000415314
	Limnocharis flava	0.718299	0.000190657	0.0555713	0.0719616	0.0488549
	Neptunia oleracea	0.163159	0.577547	0.00529127	0.0170706	0.235969
	Limnocharis flava	0.907578	0.072486	0.000411717	0.0147468	0.00289749
	Neptunia oleracea	0.842825	0.078759	0.0116933	0.0348442	0.0290211
	Ipomea aquatica	0.117611	0.000111044	0.0578098	0.00434212	0.749345
	Ipomea aquatica	0.649994	0.109776	0.107182	0.0826354	0.0498542
	Momordica balsamina	0.137726	0.300078	0.281483	0.251045	0.0179672
	Amaranthus hybridus	0.970528	0.0017184	0.0149309	0.00116571	0.00510933
	Lycopersicon esculentum	0.915656	0.0157581	0.05108	0.011086	0.0061324
	Telfaria occidentalis	0.943406	0.00772935	0.035931	0.00872952	0.00416776
	Basella alba	0.891126	0.0336369	0.0440198	0.0301083	0.00105476
	Myrianthus arboreus	0.195853	0.00179281	0.267997	0.256381	0.191037
	Moringa oleifera	0.0187568	0.1054	0.777004	0.0489818	0.0466337
	Zingiber officinalis	0.276695	0.384301	0.188485	0.0908442	0.0550284
	Piper quineense	0.0472137	0.289223	0.19347	0.403669	0.0218089
	Fagonia cretica	0.467628	0.413664	0.0660181	0.00030738	0.0096673
	Tribulus terrestris	0.730047	0.0628172	0.160571	0.0175781	0.0257659
	Chrozophora tinctoria	0.445028	0.00674027	0.347771	0.12169	0.047748
	Ricinus communis	0.434268	0.316183	0.00440053	0.113078	0.118686
	Values in bold correspond for each observation to the factor for which the squared cosine is the largest
