# Supplementary material for: Nutritional values of wild edible freshwater macrophytes
Source: PeerJ. 2023 Jul 11;11:e15496. doi: 10.7717/peerj.15496 (PMC10348304; doi:10.7717/peerj.15496)
Supplement: Supplemental Information 3 [file peerj-11-15496-s003.xlsx]

## Sheet: 1-12
		(mg kg-1)
No.	Species	Ca	Mg	Cu	Mn	Zn	Reference (s)
1	Eichhornia crassipes	11863.5	1649	27	444	158.5	Present study
2	Limnocharis flava	8066.5	1198.5	16	144.5	110	Present study
3	Neptunia oleracea	3583	2616	20	146	107	Present study
4	Neptunia oleracea*	3814.2	1866.7	29.7	142.3	105.3	Saupi, Zakaria & Bujang (2009)
5	Melochia corchorifolia	7503.7	1083.3	335	96.8	673	Umar et al. (2007
6	Momordica balsamina	9410	2200	54.4	116	31.8	Hassan & Umar (2006)
7	Myrianthus arboreus	540	4600	3.55	6.957	1.82	Amata (2010)
8	Achillea fragrantissima	14400	1200	4.44	88.5	400	Daur (2015)
9	Amaranthus virdis	15280	8255	12.44	108.1	356	Daur (2015)
10	Asteriscus graveolens	13200	1050	26.8	107.1	544	Daur (2015)
11	Chenopodium album	11500	8900	14.44	148	21.2	Daur (2015)
12	Conyza bonariensis	10200	1092	8.2	152.6	38.8	Daur (2015)

## Sheet: Figure 5 PCA Mineral
	You are using the XLSTAT trial version. Number of days remaining until the trial expires: 14
	XLSTAT 2022.3.2.1352 - Principal Component Analysis (PCA) - Start time: 07/09/2022 at 19:36:08 / End time: 07/09/2022 at 19:36:13 / Microsoft Excel 16.015427
	Observations/variables table: Workbook = PCA mineral content .xlsx / Sheet = Sheet1 / Range = Sheet1!$C$1:$G$13 / 12 rows and 5 columns
	Observation labels: Workbook = PCA mineral content .xlsx / Sheet = Sheet1 / Range = Sheet1!$B$1:$B$13 / 12 rows and 1 column
	PCA type: Correlation
	Filter factors Maximum number = 5
	Standardisation: (n)
	Type of biplot: Distance biplot / Coefficient = Automatic
	Summary statistics:
	Variable	Observations	Obs. with missing data	Obs. without missing data	Minimum	Maximum	Mean	Std. deviation
	Ca	12	0	12	540	15280	9113.41	4602.96
	Mg	12	0	12	1050	8900	2975.88	2803.85
	Cu	12	0	12	3.55	335	45.9975	92.0688
	Mn	12	0	12	6.957	444	141.738	103.379
	Zn	12	0	12	1.82	673	212.285	225.136
	Correlation matrix (Pearson (n)):
	Variables	Ca	Mg	Cu	Mn	Zn
	Ca	1	0.157495	-0.10961	0.270972	0.412946
	Mg	0.157495	1	-0.246015	-0.163624	-0.242334
	Cu	-0.10961	-0.246015	1	-0.0957934	0.625992
	Mn	0.270972	-0.163624	-0.0957934	1	-0.133346
	Zn	0.412946	-0.242334	0.625992	-0.133346	1
	Values in bold are different from 0 with a significance level alpha=0.05
	Principal Component Analysis:
	Eigenvalues:
		F1	F2	F3	F4	F5
	Eigenvalue	1.8078	1.34054	1.12203	0.589441	0.140192
	Variability (%)	36.156	26.8108	22.4406	11.7888	2.80384
	Cumulative %	36.156	62.9668	85.4074	97.1962	100
	Eigenvectors:
		F1	F2	F3	F4	F5
	Ca	0.178929	0.770384	0.253655	-0.262056	-0.491406
	Mg	-0.346179	0.166733	0.698706	0.572551	0.190672
	Cu	0.616302	-0.246497	0.0128943	0.584166	-0.466899
	Mn	-0.0555363	0.543683	-0.62977	0.495828	0.242627
	Zn	0.68208	0.149523	0.225148	-0.128126	0.66731
	Factor loadings:
		F1	F2	F3	F4	F5
	Ca	0.240578	0.891963	0.268687	-0.201193	-0.183993
	Mg	-0.465453	0.193046	0.74011	0.439576	0.0713918
	Cu	0.828646	-0.285398	0.0136584	0.448494	-0.174817
	Mn	-0.0746711	0.629486	-0.667089	0.380672	0.090845
	Zn	0.917087	0.17312	0.23849	-0.098369	0.249856
	Correlations between variables and factors:
		F1	F2	F3	F4	F5
	Ca	0.240578	0.891963	0.268687	-0.201193	-0.183993
	Mg	-0.465453	0.193046	0.74011	0.439576	0.0713918
	Cu	0.828646	-0.285398	0.0136584	0.448494	-0.174817
	Mn	-0.0746711	0.629486	-0.667089	0.380672	0.090845
	Zn	0.917087	0.17312	0.23849	-0.098369	0.249856
	Contribution of the variables (%):
		F1	F2	F3	F4	F5
	Ca	3.20155	59.3491	6.43411	6.86733	24.1479
	Mg	11.984	2.77998	48.8191	32.7814	3.63558
	Cu	37.9828	6.07608	0.0166264	34.125	21.7995
	Mn	0.308429	29.5592	39.661	24.5846	5.8868
	Zn	46.5233	2.2357	5.06918	1.64163	44.5302
	Squared cosines of the variables:
		F1	F2	F3	F4	F5
	Ca	0.0578776	0.795598	0.0721925	0.0404788	0.0338535
	Mg	0.216646	0.0372667	0.547763	0.193227	0.00509679
	Cu	0.686653	0.0814522	0.000186553	0.201147	0.0305611
	Mn	0.00557577	0.396252	0.445008	0.144911	0.00825281
	Zn	0.841048	0.0299705	0.0568776	0.00967646	0.0624278
	Values in bold correspond for each variable to the factor for which the squared cosine is the largest
	Factor scores:
		F1	F2	F3	F4	F5
	Eichhornia crassipes	-0.189851	2.07446	-2.16924	0.973725	0.274164
	Limnocharis flava	-0.348248	-0.265299	-0.651666	-0.440988	-0.160505
	Neptunia oleracea	-0.695445	-0.966041	-0.552875	0.163749	0.413315
	Neptunia oleracea*	-0.524916	-1.02079	-0.711408	0.0369468	0.268603
	Melochia corchorifolia	3.68236	-1.13435	0.224188	1.10832	-0.169557
	Momordica balsamina	-0.385833	-0.286416	-0.208397	-0.149085	-0.754527
	Myrianthus arboreus	-1.44466	-2.16548	0.560792	0.024818	0.314217
	Achillea fragrantissima	0.776964	0.767831	0.370798	-1.3468	-0.0448755
	Amaranthus virdis	-0.191385	1.41462	2.0882	0.282932	0.227555
	Asteriscus graveolens	1.34915	0.688275	0.298022	-1.15167	0.451236
	Chenopodium album	-1.49586	0.775236	1.43522	1.05741	-0.254407
	Conyza bonariensis	-0.532272	0.117957	-0.683636	-0.55936	-0.565219
	Contribution of the observations (%):
		F1	F2	F3	F4	F5
	Eichhornia crassipes	0.166148	26.7517	34.9487	13.4045	4.46805
	Limnocharis flava	0.559042	0.437532	3.15403	2.74936	1.53134
	Neptunia oleracea	2.22943	5.80137	2.27023	0.379086	10.1545
	Neptunia oleracea*	1.27013	6.47759	3.75883	0.0192989	4.28863
	Melochia corchorifolia	62.5059	7.999	0.373285	17.3664	1.70895
	Momordica balsamina	0.686224	0.509957	0.322551	0.314231	33.8412
	Myrianthus arboreus	9.62056	29.1506	2.33571	0.00870785	5.86886
	Achillea fragrantissima	2.78272	3.66497	1.02115	25.6439	0.119705
	Amaranthus virdis	0.168844	12.4399	32.3861	1.13173	3.07801
	Asteriscus graveolens	8.39047	2.94485	0.659648	18.7516	12.1033
	Chenopodium album	10.3145	3.736	15.2987	15.8077	3.84728
	Conyza bonariensis	1.30598	0.0864934	3.47108	4.42345	18.9902
	Axes homogeneity index:
		Value
	F1	0.333333
	F2	0.25
	F3	0.25
	F4	0.416667
	F5	0.333333
	Squared cosines of the observations:
		F1	F2	F3	F4	F5
	Eichhornia crassipes	0.00357988	0.427419	0.467366	0.0941703	0.00746557
	Limnocharis flava	0.14497	0.0841344	0.507637	0.232464	0.0307948
	Neptunia oleracea	0.251872	0.486011	0.159188	0.0139641	0.0889647
	Neptunia oleracea*	0.145236	0.549249	0.266767	0.000719528	0.0380292
	Melochia corchorifolia	0.839411	0.079656	0.00311134	0.0760421	0.00177973
	Momordica balsamina	0.171928	0.0947419	0.050157	0.0256696	0.657504
	Myrianthus arboreus	0.290263	0.652181	0.0437385	8.56627e-05	0.0137315
	Achillea fragrantissima	0.191849	0.187365	0.043695	0.576452	0.000639993
	Amaranthus virdis	0.00560908	0.306445	0.667757	0.0122585	0.00792955
	Asteriscus graveolens	0.465202	0.121073	0.0226997	0.338986	0.0520392
	Chenopodium album	0.367947	0.0988261	0.338722	0.183862	0.0106429
	Conyza bonariensis	0.20281	0.00996015	0.334558	0.223977	0.228694
	Values in bold correspond for each observation to the factor for which the squared cosine is the largest

## Sheet: XLSTAT_20220907_194541_1_HID3
2.4113	2.00277	1.15744	1.85729
0.480089	2.34934	-0.26447	0.204364
2.01896	-2.16809	-0.661062	0.0909475
1.0388	1.8284	-0.626022	-0.121051
2.81163	-1.23744	3.29435	-2.93667
		-0.182525	0.269351
		-1.70268	-0.14026
		1.14627	0.160236
		1.49325	1.80883
		1.6675	-0.242821
		0.134517	2.26457
		-0.302658	0.559565
		-1.43853	-0.802633
		-1.10764	-1.0198
		-1.1692	-1.23879
		-1.43855	-0.713107

## Sheet: XLSTAT_20220907_194541_1_HID2
1.15744	1.85729
-0.26447	0.204364
-0.661062	0.0909475
-0.626022	-0.121051
3.29435	-2.93667
-0.182525	0.269351
-1.70268	-0.14026
1.14627	0.160236
1.49325	1.80883
1.6675	-0.242821
0.134517	2.26457
-0.302658	0.559565
-1.43853	-0.802633
-1.10764	-1.0198
-1.1692	-1.23879
-1.43855	-0.713107

## Sheet: XLSTAT_20220907_194541_1_HID1
1	-3.14159	-1	-3.23114e-15
2	-3.129	-0.999921	-0.0125912
3	-3.11641	-0.999683	-0.0251804
4	-3.10382	-0.999287	-0.0377657
5	-3.09123	-0.998732	-0.0503449
6	-3.07863	-0.998019	-0.0629162
7	-3.06604	-0.997148	-0.0754775
8	-3.05345	-0.996118	-0.0880268
9	-3.04086	-0.994931	-0.100562
10	-3.02827	-0.993586	-0.113082
11	-3.01568	-0.992083	-0.125583
12	-3.00309	-0.990423	-0.138065
13	-2.99049	-0.988606	-0.150524
14	-2.9779	-0.986633	-0.16296
15	-2.96531	-0.984503	-0.17537
16	-2.95272	-0.982216	-0.187752
17	-2.94013	-0.979775	-0.200105
18	-2.92754	-0.977177	-0.212425
19	-2.91494	-0.974425	-0.224712
20	-2.90235	-0.971518	-0.236964
21	-2.88976	-0.968458	-0.249178
22	-2.87717	-0.965244	-0.261352
23	-2.86458	-0.961876	-0.273485
24	-2.85199	-0.958357	-0.285574
25	-2.8394	-0.954685	-0.297619
26	-2.8268	-0.950862	-0.309616
27	-2.81421	-0.946888	-0.321564
28	-2.80162	-0.942764	-0.333461
29	-2.78903	-0.938491	-0.345305
30	-2.77644	-0.934068	-0.357094
31	-2.76385	-0.929498	-0.368827
32	-2.75125	-0.92478	-0.380501
33	-2.73866	-0.919916	-0.392115
34	-2.72607	-0.914906	-0.403667
35	-2.71348	-0.909751	-0.415155
36	-2.70089	-0.904451	-0.426577
37	-2.6883	-0.899009	-0.437931
38	-2.67571	-0.893423	-0.449216
39	-2.66311	-0.887696	-0.46043
40	-2.65052	-0.881829	-0.47157
41	-2.63793	-0.875821	-0.482636
42	-2.62534	-0.869675	-0.493626
43	-2.61275	-0.86339	-0.504537
44	-2.60016	-0.856969	-0.515368
45	-2.58756	-0.850412	-0.526117
46	-2.57497	-0.84372	-0.536783
47	-2.56238	-0.836895	-0.547364
48	-2.54979	-0.829936	-0.557858
49	-2.5372	-0.822846	-0.568264
50	-2.52461	-0.815626	-0.57858
51	-2.51201	-0.808276	-0.588803
52	-2.49942	-0.800798	-0.598934
53	-2.48683	-0.793194	-0.60897
54	-2.47424	-0.785463	-0.618909
55	-2.46165	-0.777608	-0.628749
56	-2.44906	-0.76963	-0.638491
57	-2.43647	-0.761529	-0.648131
58	-2.42387	-0.753308	-0.657668
59	-2.41128	-0.744968	-0.667101
60	-2.39869	-0.736509	-0.676428
61	-2.3861	-0.727933	-0.685648
62	-2.37351	-0.719243	-0.694759
63	-2.36092	-0.710438	-0.70376
64	-2.34832	-0.70152	-0.71265
65	-2.33573	-0.692491	-0.721426
66	-2.32314	-0.683353	-0.730088
67	-2.31055	-0.674106	-0.738635
68	-2.29796	-0.664752	-0.747064
69	-2.28537	-0.655293	-0.755375
70	-2.27278	-0.64573	-0.763566
71	-2.26018	-0.636065	-0.771636
72	-2.24759	-0.626298	-0.779583
73	-2.235	-0.616433	-0.787407
74	-2.22241	-0.60647	-0.795107
75	-2.20982	-0.59641	-0.80268
76	-2.19723	-0.586256	-0.810126
77	-2.18463	-0.576009	-0.817443
78	-2.17204	-0.565671	-0.824631
79	-2.15945	-0.555243	-0.831688
80	-2.14686	-0.544727	-0.838613
81	-2.13427	-0.534125	-0.845406
82	-2.12168	-0.523438	-0.852064
83	-2.10909	-0.512668	-0.858587
84	-2.09649	-0.501816	-0.864974
85	-2.0839	-0.490885	-0.871224
86	-2.07131	-0.479877	-0.877336
87	-2.05872	-0.468792	-0.883309
88	-2.04613	-0.457633	-0.889141
89	-2.03354	-0.446401	-0.894833
90	-2.02094	-0.435099	-0.900383
91	-2.00835	-0.423727	-0.90579
92	-1.99576	-0.412289	-0.911053
93	-1.98317	-0.400785	-0.916172
94	-1.97058	-0.389217	-0.921146
95	-1.95799	-0.377588	-0.925974
96	-1.9454	-0.365899	-0.930655
97	-1.9328	-0.354152	-0.935188
98	-1.92021	-0.342349	-0.939573
99	-1.90762	-0.330491	-0.943809
100	-1.89503	-0.318581	-0.947896
101	-1.88244	-0.306621	-0.951832
102	-1.86985	-0.294612	-0.955617
103	-1.85725	-0.282556	-0.959251
104	-1.84466	-0.270456	-0.962732
105	-1.83207	-0.258312	-0.966061
106	-1.81948	-0.246128	-0.969237
107	-1.80689	-0.233904	-0.97226
108	-1.7943	-0.221644	-0.975128
109	-1.7817	-0.209348	-0.977841
110	-1.76911	-0.19702	-0.9804
111	-1.75652	-0.18466	-0.982803
112	-1.74393	-0.17227	-0.98505
113	-1.73134	-0.159854	-0.987141
114	-1.71875	-0.147412	-0.989075
115	-1.70616	-0.134946	-0.990853
116	-1.69356	-0.122459	-0.992474
117	-1.68097	-0.109953	-0.993937
118	-1.66838	-0.0974297	-0.995242
119	-1.65579	-0.0848907	-0.99639
120	-1.6432	-0.0723382	-0.99738
121	-1.63061	-0.0597742	-0.998212
122	-1.61801	-0.0472008	-0.998885
123	-1.60542	-0.0346199	-0.999401
124	-1.59283	-0.0220334	-0.999757
125	-1.58024	-0.00944352	-0.999955
126	-1.56765	0.00314788	-0.999995
127	-1.55506	0.0157388	-0.999876
128	-1.54247	0.0283272	-0.999599
129	-1.52987	0.0409111	-0.999163
130	-1.51728	0.0534886	-0.998568
131	-1.50469	0.0660575	-0.997816
132	-1.4921	0.078616	-0.996905
133	-1.47951	0.091162	-0.995836
134	-1.46692	0.103694	-0.994609
135	-1.45432	0.116209	-0.993225
136	-1.44173	0.128705	-0.991683
137	-1.42914	0.141182	-0.989984
138	-1.41655	0.153636	-0.988128
139	-1.40396	0.166065	-0.986115
140	-1.39137	0.178468	-0.983946
141	-1.37878	0.190843	-0.981621
142	-1.36618	0.203188	-0.97914
143	-1.35359	0.2155	-0.976504
144	-1.341	0.227779	-0.973713
145	-1.32841	0.240021	-0.970768
146	-1.31582	0.252225	-0.967669
147	-1.30323	0.264389	-0.964416
148	-1.29063	0.276511	-0.961011
149	-1.27804	0.28859	-0.957453
150	-1.26545	0.300622	-0.953743
151	-1.25286	0.312607	-0.949882
152	-1.24027	0.324543	-0.945871
153	-1.22768	0.336427	-0.94171
154	-1.21508	0.348257	-0.937399
155	-1.20249	0.360033	-0.93294
156	-1.1899	0.371751	-0.928332
157	-1.17731	0.38341	-0.923578
158	-1.16472	0.395009	-0.918677
159	-1.15213	0.406545	-0.913631
160	-1.13954	0.418016	-0.908439
161	-1.12694	0.429422	-0.903104
162	-1.11435	0.440759	-0.897626
163	-1.10176	0.452026	-0.892005
164	-1.08917	0.463222	-0.886242
165	-1.07658	0.474344	-0.88034
166	-1.06399	0.485391	-0.874297
167	-1.05139	0.496361	-0.868116
168	-1.0388	0.507252	-0.861798
169	-1.02621	0.518063	-0.855343
170	-1.01362	0.528792	-0.848752
171	-1.00103	0.539437	-0.842026
172	-0.988437	0.549996	-0.835167
173	-0.975845	0.560468	-0.828176
174	-0.963254	0.570851	-0.821053
175	-0.950662	0.581144	-0.813801
176	-0.938071	0.591345	-0.806419
177	-0.925479	0.601452	-0.798909
178	-0.912888	0.611463	-0.791273
179	-0.900296	0.621378	-0.783511
180	-0.887705	0.631194	-0.775625
181	-0.875113	0.64091	-0.767616
182	-0.862521	0.650525	-0.759485
183	-0.84993	0.660036	-0.751234
184	-0.837338	0.669442	-0.742864
185	-0.824747	0.678743	-0.734376
186	-0.812155	0.687936	-0.725772
187	-0.799564	0.69702	-0.717052
188	-0.786972	0.705993	-0.708219
189	-0.774381	0.714854	-0.699273
190	-0.761789	0.723602	-0.690217
191	-0.749197	0.732236	-0.681051
192	-0.736606	0.740753	-0.671778
193	-0.724014	0.749153	-0.662397
194	-0.711423	0.757434	-0.652912
195	-0.698831	0.765595	-0.643323
196	-0.68624	0.773634	-0.633633
197	-0.673648	0.781551	-0.623841
198	-0.661057	0.789344	-0.613951
199	-0.648465	0.797012	-0.603964
200	-0.635873	0.804553	-0.59388
201	-0.623282	0.811967	-0.583703
202	-0.61069	0.819252	-0.573433
203	-0.598099	0.826408	-0.563072
204	-0.585507	0.833432	-0.552622
205	-0.572916	0.840324	-0.542084
206	-0.560324	0.847083	-0.531461
207	-0.547733	0.853707	-0.520753
208	-0.535141	0.860197	-0.509962
209	-0.522549	0.86655	-0.499091
210	-0.509958	0.872765	-0.488141
211	-0.497366	0.878842	-0.477113
212	-0.484775	0.88478	-0.466009
213	-0.472183	0.890577	-0.454832
214	-0.459592	0.896234	-0.443582
215	-0.447	0.901748	-0.432262
216	-0.434409	0.907119	-0.420874
217	-0.421817	0.912347	-0.409419
218	-0.409225	0.917429	-0.397899
219	-0.396634	0.922367	-0.386316
220	-0.384042	0.927158	-0.374671
221	-0.371451	0.931802	-0.362968
222	-0.358859	0.936298	-0.351206
223	-0.346268	0.940646	-0.339389
224	-0.333676	0.944845	-0.327519
225	-0.321085	0.948894	-0.315596
226	-0.308493	0.952792	-0.303623
227	-0.295902	0.95654	-0.291602
228	-0.28331	0.960135	-0.279535
229	-0.270718	0.963579	-0.267424
230	-0.258127	0.96687	-0.25527
231	-0.245535	0.970007	-0.243076
232	-0.232944	0.972991	-0.230843
233	-0.220352	0.975821	-0.218573
234	-0.207761	0.978495	-0.206269
235	-0.195169	0.981015	-0.193932
236	-0.182578	0.983379	-0.181565
237	-0.169986	0.985587	-0.169169
238	-0.157394	0.987639	-0.156745
239	-0.144803	0.989534	-0.144297
240	-0.132211	0.991273	-0.131826
241	-0.11962	0.992854	-0.119335
242	-0.107028	0.994278	-0.106824
243	-0.0944367	0.995544	-0.0942963
244	-0.0818451	0.996653	-0.0817538
245	-0.0692535	0.997603	-0.0691982
246	-0.056662	0.998395	-0.0566317
247	-0.0440704	0.999029	-0.0440562
248	-0.0314789	0.999505	-0.0314737
249	-0.0188873	0.999822	-0.0188862
250	-0.00629578	0.99998	-0.00629574
251	0.00629578	0.99998	0.00629574
252	0.0188873	0.999822	0.0188862
253	0.0314789	0.999505	0.0314737
254	0.0440704	0.999029	0.0440562
255	0.056662	0.998395	0.0566317
256	0.0692535	0.997603	0.0691982
257	0.0818451	0.996653	0.0817538
258	0.0944367	0.995544	0.0942963
259	0.107028	0.994278	0.106824
260	0.11962	0.992854	0.119335
261	0.132211	0.991273	0.131826
262	0.144803	0.989534	0.144297
263	0.157394	0.987639	0.156745
264	0.169986	0.985587	0.169169
265	0.182578	0.983379	0.181565
266	0.195169	0.981015	0.193932
267	0.207761	0.978495	0.206269
268	0.220352	0.975821	0.218573
269	0.232944	0.972991	0.230843
270	0.245535	0.970007	0.243076
271	0.258127	0.96687	0.25527
272	0.270718	0.963579	0.267424
273	0.28331	0.960135	0.279535
274	0.295902	0.95654	0.291602
275	0.308493	0.952792	0.303623
276	0.321085	0.948894	0.315596
277	0.333676	0.944845	0.327519
278	0.346268	0.940646	0.339389
279	0.358859	0.936298	0.351206
280	0.371451	0.931802	0.362968
281	0.384042	0.927158	0.374671
282	0.396634	0.922367	0.386316
283	0.409225	0.917429	0.397899
284	0.421817	0.912347	0.409419
285	0.434409	0.907119	0.420874
286	0.447	0.901748	0.432262
287	0.459592	0.896234	0.443582
288	0.472183	0.890577	0.454832
289	0.484775	0.88478	0.466009
290	0.497366	0.878842	0.477113
291	0.509958	0.872765	0.488141
292	0.522549	0.86655	0.499091
293	0.535141	0.860197	0.509962
294	0.547733	0.853707	0.520753
295	0.560324	0.847083	0.531461
296	0.572916	0.840324	0.542084
297	0.585507	0.833432	0.552622
298	0.598099	0.826408	0.563072
299	0.61069	0.819252	0.573433
300	0.623282	0.811967	0.583703
301	0.635873	0.804553	0.59388
302	0.648465	0.797012	0.603964
303	0.661057	0.789344	0.613951
304	0.673648	0.781551	0.623841
305	0.68624	0.773634	0.633633
306	0.698831	0.765595	0.643323
307	0.711423	0.757434	0.652912
308	0.724014	0.749153	0.662397
309	0.736606	0.740753	0.671778
310	0.749197	0.732236	0.681051
311	0.761789	0.723602	0.690217
312	0.774381	0.714854	0.699273
313	0.786972	0.705993	0.708219
314	0.799564	0.69702	0.717052
315	0.812155	0.687936	0.725772
316	0.824747	0.678743	0.734376
317	0.837338	0.669442	0.742864
318	0.84993	0.660036	0.751234
319	0.862521	0.650525	0.759485
320	0.875113	0.64091	0.767616
321	0.887705	0.631194	0.775625
322	0.900296	0.621378	0.783511
323	0.912888	0.611463	0.791273
324	0.925479	0.601452	0.798909
325	0.938071	0.591345	0.806419
326	0.950662	0.581144	0.813801
327	0.963254	0.570851	0.821053
328	0.975845	0.560468	0.828176
329	0.988437	0.549996	0.835167
330	1.00103	0.539437	0.842026
331	1.01362	0.528792	0.848752
332	1.02621	0.518063	0.855343
333	1.0388	0.507252	0.861798
334	1.05139	0.496361	0.868116
335	1.06399	0.485391	0.874297
336	1.07658	0.474344	0.88034
337	1.08917	0.463222	0.886242
338	1.10176	0.452026	0.892005
339	1.11435	0.440759	0.897626
340	1.12694	0.429422	0.903104
341	1.13954	0.418016	0.908439
342	1.15213	0.406545	0.913631
343	1.16472	0.395009	0.918677
344	1.17731	0.38341	0.923578
345	1.1899	0.371751	0.928332
346	1.20249	0.360033	0.93294
347	1.21508	0.348257	0.937399
348	1.22768	0.336427	0.94171
349	1.24027	0.324543	0.945871
350	1.25286	0.312607	0.949882
351	1.26545	0.300622	0.953743
352	1.27804	0.28859	0.957453
353	1.29063	0.276511	0.961011
354	1.30323	0.264389	0.964416
355	1.31582	0.252225	0.967669
356	1.32841	0.240021	0.970768
357	1.341	0.227779	0.973713
358	1.35359	0.2155	0.976504
359	1.36618	0.203188	0.97914
360	1.37878	0.190843	0.981621
361	1.39137	0.178468	0.983946
362	1.40396	0.166065	0.986115
363	1.41655	0.153636	0.988128
364	1.42914	0.141182	0.989984
365	1.44173	0.128705	0.991683
366	1.45432	0.116209	0.993225
367	1.46692	0.103694	0.994609
368	1.47951	0.091162	0.995836
369	1.4921	0.078616	0.996905
370	1.50469	0.0660575	0.997816
371	1.51728	0.0534886	0.998568
372	1.52987	0.0409111	0.999163
373	1.54247	0.0283272	0.999599
374	1.55506	0.0157388	0.999876
375	1.56765	0.00314788	0.999995
376	1.58024	-0.00944352	0.999955
377	1.59283	-0.0220334	0.999757
378	1.60542	-0.0346199	0.999401
379	1.61801	-0.0472008	0.998885
380	1.63061	-0.0597742	0.998212
381	1.6432	-0.0723382	0.99738
382	1.65579	-0.0848907	0.99639
383	1.66838	-0.0974297	0.995242
384	1.68097	-0.109953	0.993937
385	1.69356	-0.122459	0.992474
386	1.70616	-0.134946	0.990853
387	1.71875	-0.147412	0.989075
388	1.73134	-0.159854	0.987141
389	1.74393	-0.17227	0.98505
390	1.75652	-0.18466	0.982803
391	1.76911	-0.19702	0.9804
392	1.7817	-0.209348	0.977841
393	1.7943	-0.221644	0.975128
394	1.80689	-0.233904	0.97226
395	1.81948	-0.246128	0.969237
396	1.83207	-0.258312	0.966061
397	1.84466	-0.270456	0.962732
398	1.85725	-0.282556	0.959251
399	1.86985	-0.294612	0.955617
400	1.88244	-0.306621	0.951832
401	1.89503	-0.318581	0.947896
402	1.90762	-0.330491	0.943809
403	1.92021	-0.342349	0.939573
404	1.9328	-0.354152	0.935188
405	1.9454	-0.365899	0.930655
406	1.95799	-0.377588	0.925974
407	1.97058	-0.389217	0.921146
408	1.98317	-0.400785	0.916172
409	1.99576	-0.412289	0.911053
410	2.00835	-0.423727	0.90579
411	2.02094	-0.435099	0.900383
412	2.03354	-0.446401	0.894833
413	2.04613	-0.457633	0.889141
414	2.05872	-0.468792	0.883309
415	2.07131	-0.479877	0.877336
416	2.0839	-0.490885	0.871224
417	2.09649	-0.501816	0.864974
418	2.10909	-0.512668	0.858587
419	2.12168	-0.523438	0.852064
420	2.13427	-0.534125	0.845406
421	2.14686	-0.544727	0.838613
422	2.15945	-0.555243	0.831688
423	2.17204	-0.565671	0.824631
424	2.18463	-0.576009	0.817443
425	2.19723	-0.586256	0.810126
426	2.20982	-0.59641	0.80268
427	2.22241	-0.60647	0.795107
428	2.235	-0.616433	0.787407
429	2.24759	-0.626298	0.779583
430	2.26018	-0.636065	0.771636
431	2.27278	-0.64573	0.763566
432	2.28537	-0.655293	0.755375
433	2.29796	-0.664752	0.747064
434	2.31055	-0.674106	0.738635
435	2.32314	-0.683353	0.730088
436	2.33573	-0.692491	0.721426
437	2.34832	-0.70152	0.71265
438	2.36092	-0.710438	0.70376
439	2.37351	-0.719243	0.694759
440	2.3861	-0.727933	0.685648
441	2.39869	-0.736509	0.676428
442	2.41128	-0.744968	0.667101
443	2.42387	-0.753308	0.657668
444	2.43647	-0.761529	0.648131
445	2.44906	-0.76963	0.638491
446	2.46165	-0.777608	0.628749
447	2.47424	-0.785463	0.618909
448	2.48683	-0.793194	0.60897
449	2.49942	-0.800798	0.598934
450	2.51201	-0.808276	0.588803
451	2.52461	-0.815626	0.57858
452	2.5372	-0.822846	0.568264
453	2.54979	-0.829936	0.557858
454	2.56238	-0.836895	0.547364
455	2.57497	-0.84372	0.536783
456	2.58756	-0.850412	0.526117
457	2.60016	-0.856969	0.515368
458	2.61275	-0.86339	0.504537
459	2.62534	-0.869675	0.493626
460	2.63793	-0.875821	0.482636
461	2.65052	-0.881829	0.47157
462	2.66311	-0.887696	0.46043
463	2.67571	-0.893423	0.449216
464	2.6883	-0.899009	0.437931
465	2.70089	-0.904451	0.426577
466	2.71348	-0.909751	0.415155
467	2.72607	-0.914906	0.403667
468	2.73866	-0.919916	0.392115
469	2.75125	-0.92478	0.380501
470	2.76385	-0.929498	0.368827
471	2.77644	-0.934068	0.357094
472	2.78903	-0.938491	0.345305
473	2.80162	-0.942764	0.333461
474	2.81421	-0.946888	0.321564
475	2.8268	-0.950862	0.309616
476	2.8394	-0.954685	0.297619
477	2.85199	-0.958357	0.285574
478	2.86458	-0.961876	0.273485
479	2.87717	-0.965244	0.261352
480	2.88976	-0.968458	0.249178
481	2.90235	-0.971518	0.236964
482	2.91494	-0.974425	0.224712
483	2.92754	-0.977177	0.212425
484	2.94013	-0.979775	0.200105
485	2.95272	-0.982216	0.187752
486	2.96531	-0.984503	0.17537
487	2.9779	-0.986633	0.16296
488	2.99049	-0.988606	0.150524
489	3.00309	-0.990423	0.138065
490	3.01568	-0.992083	0.125583
491	3.02827	-0.993586	0.113082
492	3.04086	-0.994931	0.100562
493	3.05345	-0.996118	0.0880268
494	3.06604	-0.997148	0.0754775
495	3.07863	-0.998019	0.0629162
496	3.09123	-0.998732	0.0503449
497	3.10382	-0.999287	0.0377657
498	3.11641	-0.999683	0.0251804
499	3.129	-0.999921	0.0125912
500	3.14159	-1	-1.36443e-14

## Sheet: XLSTAT_20220907_194541_1_HID
0.745132	0.569942
0.148355	0.668567
0.623891	-0.616987
0.321005	0.520321
0.868839	-0.352148

## Sheet: XLSTAT_20220907_193551_1_HID3
0.758779	3.26695	-0.189851	2.07446
-1.46803	0.70706	-0.348248	-0.265299
2.61354	-1.04531	-0.695445	-0.966041
-0.235512	2.30559	-0.524916	-1.02079
2.89248	0.634078	3.68236	-1.13435
		-0.385833	-0.286416
		-1.44466	-2.16548
		0.776964	0.767831
		-0.191385	1.41462
		1.34915	0.688275
		-1.49586	0.775236
		-0.532272	0.117957

## Sheet: XLSTAT_20220907_193551_1_HID2
-0.189851	2.07446
-0.348248	-0.265299
-0.695445	-0.966041
-0.524916	-1.02079
3.68236	-1.13435
-0.385833	-0.286416
-1.44466	-2.16548
0.776964	0.767831
-0.191385	1.41462
1.34915	0.688275
-1.49586	0.775236
-0.532272	0.117957

## Sheet: XLSTAT_20220907_193551_1_HID1
1	-3.14159	-1	-3.23114e-15
2	-3.129	-0.999921	-0.0125912
3	-3.11641	-0.999683	-0.0251804
4	-3.10382	-0.999287	-0.0377657
5	-3.09123	-0.998732	-0.0503449
6	-3.07863	-0.998019	-0.0629162
7	-3.06604	-0.997148	-0.0754775
8	-3.05345	-0.996118	-0.0880268
9	-3.04086	-0.994931	-0.100562
10	-3.02827	-0.993586	-0.113082
11	-3.01568	-0.992083	-0.125583
12	-3.00309	-0.990423	-0.138065
13	-2.99049	-0.988606	-0.150524
14	-2.9779	-0.986633	-0.16296
15	-2.96531	-0.984503	-0.17537
16	-2.95272	-0.982216	-0.187752
17	-2.94013	-0.979775	-0.200105
18	-2.92754	-0.977177	-0.212425
19	-2.91494	-0.974425	-0.224712
20	-2.90235	-0.971518	-0.236964
21	-2.88976	-0.968458	-0.249178
22	-2.87717	-0.965244	-0.261352
23	-2.86458	-0.961876	-0.273485
24	-2.85199	-0.958357	-0.285574
25	-2.8394	-0.954685	-0.297619
26	-2.8268	-0.950862	-0.309616
27	-2.81421	-0.946888	-0.321564
28	-2.80162	-0.942764	-0.333461
29	-2.78903	-0.938491	-0.345305
30	-2.77644	-0.934068	-0.357094
31	-2.76385	-0.929498	-0.368827
32	-2.75125	-0.92478	-0.380501
33	-2.73866	-0.919916	-0.392115
34	-2.72607	-0.914906	-0.403667
35	-2.71348	-0.909751	-0.415155
36	-2.70089	-0.904451	-0.426577
37	-2.6883	-0.899009	-0.437931
38	-2.67571	-0.893423	-0.449216
39	-2.66311	-0.887696	-0.46043
40	-2.65052	-0.881829	-0.47157
41	-2.63793	-0.875821	-0.482636
42	-2.62534	-0.869675	-0.493626
43	-2.61275	-0.86339	-0.504537
44	-2.60016	-0.856969	-0.515368
45	-2.58756	-0.850412	-0.526117
46	-2.57497	-0.84372	-0.536783
47	-2.56238	-0.836895	-0.547364
48	-2.54979	-0.829936	-0.557858
49	-2.5372	-0.822846	-0.568264
50	-2.52461	-0.815626	-0.57858
51	-2.51201	-0.808276	-0.588803
52	-2.49942	-0.800798	-0.598934
53	-2.48683	-0.793194	-0.60897
54	-2.47424	-0.785463	-0.618909
55	-2.46165	-0.777608	-0.628749
56	-2.44906	-0.76963	-0.638491
57	-2.43647	-0.761529	-0.648131
58	-2.42387	-0.753308	-0.657668
59	-2.41128	-0.744968	-0.667101
60	-2.39869	-0.736509	-0.676428
61	-2.3861	-0.727933	-0.685648
62	-2.37351	-0.719243	-0.694759
63	-2.36092	-0.710438	-0.70376
64	-2.34832	-0.70152	-0.71265
65	-2.33573	-0.692491	-0.721426
66	-2.32314	-0.683353	-0.730088
67	-2.31055	-0.674106	-0.738635
68	-2.29796	-0.664752	-0.747064
69	-2.28537	-0.655293	-0.755375
70	-2.27278	-0.64573	-0.763566
71	-2.26018	-0.636065	-0.771636
72	-2.24759	-0.626298	-0.779583
73	-2.235	-0.616433	-0.787407
74	-2.22241	-0.60647	-0.795107
75	-2.20982	-0.59641	-0.80268
76	-2.19723	-0.586256	-0.810126
77	-2.18463	-0.576009	-0.817443
78	-2.17204	-0.565671	-0.824631
79	-2.15945	-0.555243	-0.831688
80	-2.14686	-0.544727	-0.838613
81	-2.13427	-0.534125	-0.845406
82	-2.12168	-0.523438	-0.852064
83	-2.10909	-0.512668	-0.858587
84	-2.09649	-0.501816	-0.864974
85	-2.0839	-0.490885	-0.871224
86	-2.07131	-0.479877	-0.877336
87	-2.05872	-0.468792	-0.883309
88	-2.04613	-0.457633	-0.889141
89	-2.03354	-0.446401	-0.894833
90	-2.02094	-0.435099	-0.900383
91	-2.00835	-0.423727	-0.90579
92	-1.99576	-0.412289	-0.911053
93	-1.98317	-0.400785	-0.916172
94	-1.97058	-0.389217	-0.921146
95	-1.95799	-0.377588	-0.925974
96	-1.9454	-0.365899	-0.930655
97	-1.9328	-0.354152	-0.935188
98	-1.92021	-0.342349	-0.939573
99	-1.90762	-0.330491	-0.943809
100	-1.89503	-0.318581	-0.947896
101	-1.88244	-0.306621	-0.951832
102	-1.86985	-0.294612	-0.955617
103	-1.85725	-0.282556	-0.959251
104	-1.84466	-0.270456	-0.962732
105	-1.83207	-0.258312	-0.966061
106	-1.81948	-0.246128	-0.969237
107	-1.80689	-0.233904	-0.97226
108	-1.7943	-0.221644	-0.975128
109	-1.7817	-0.209348	-0.977841
110	-1.76911	-0.19702	-0.9804
111	-1.75652	-0.18466	-0.982803
112	-1.74393	-0.17227	-0.98505
113	-1.73134	-0.159854	-0.987141
114	-1.71875	-0.147412	-0.989075
115	-1.70616	-0.134946	-0.990853
116	-1.69356	-0.122459	-0.992474
117	-1.68097	-0.109953	-0.993937
118	-1.66838	-0.0974297	-0.995242
119	-1.65579	-0.0848907	-0.99639
120	-1.6432	-0.0723382	-0.99738
121	-1.63061	-0.0597742	-0.998212
122	-1.61801	-0.0472008	-0.998885
123	-1.60542	-0.0346199	-0.999401
124	-1.59283	-0.0220334	-0.999757
125	-1.58024	-0.00944352	-0.999955
126	-1.56765	0.00314788	-0.999995
127	-1.55506	0.0157388	-0.999876
128	-1.54247	0.0283272	-0.999599
129	-1.52987	0.0409111	-0.999163
130	-1.51728	0.0534886	-0.998568
131	-1.50469	0.0660575	-0.997816
132	-1.4921	0.078616	-0.996905
133	-1.47951	0.091162	-0.995836
134	-1.46692	0.103694	-0.994609
135	-1.45432	0.116209	-0.993225
136	-1.44173	0.128705	-0.991683
137	-1.42914	0.141182	-0.989984
138	-1.41655	0.153636	-0.988128
139	-1.40396	0.166065	-0.986115
140	-1.39137	0.178468	-0.983946
141	-1.37878	0.190843	-0.981621
142	-1.36618	0.203188	-0.97914
143	-1.35359	0.2155	-0.976504
144	-1.341	0.227779	-0.973713
145	-1.32841	0.240021	-0.970768
146	-1.31582	0.252225	-0.967669
147	-1.30323	0.264389	-0.964416
148	-1.29063	0.276511	-0.961011
149	-1.27804	0.28859	-0.957453
150	-1.26545	0.300622	-0.953743
151	-1.25286	0.312607	-0.949882
152	-1.24027	0.324543	-0.945871
153	-1.22768	0.336427	-0.94171
154	-1.21508	0.348257	-0.937399
155	-1.20249	0.360033	-0.93294
156	-1.1899	0.371751	-0.928332
157	-1.17731	0.38341	-0.923578
158	-1.16472	0.395009	-0.918677
159	-1.15213	0.406545	-0.913631
160	-1.13954	0.418016	-0.908439
161	-1.12694	0.429422	-0.903104
162	-1.11435	0.440759	-0.897626
163	-1.10176	0.452026	-0.892005
164	-1.08917	0.463222	-0.886242
165	-1.07658	0.474344	-0.88034
166	-1.06399	0.485391	-0.874297
167	-1.05139	0.496361	-0.868116
168	-1.0388	0.507252	-0.861798
169	-1.02621	0.518063	-0.855343
170	-1.01362	0.528792	-0.848752
171	-1.00103	0.539437	-0.842026
172	-0.988437	0.549996	-0.835167
173	-0.975845	0.560468	-0.828176
174	-0.963254	0.570851	-0.821053
175	-0.950662	0.581144	-0.813801
176	-0.938071	0.591345	-0.806419
177	-0.925479	0.601452	-0.798909
178	-0.912888	0.611463	-0.791273
179	-0.900296	0.621378	-0.783511
180	-0.887705	0.631194	-0.775625
181	-0.875113	0.64091	-0.767616
182	-0.862521	0.650525	-0.759485
183	-0.84993	0.660036	-0.751234
184	-0.837338	0.669442	-0.742864
185	-0.824747	0.678743	-0.734376
186	-0.812155	0.687936	-0.725772
187	-0.799564	0.69702	-0.717052
188	-0.786972	0.705993	-0.708219
189	-0.774381	0.714854	-0.699273
190	-0.761789	0.723602	-0.690217
191	-0.749197	0.732236	-0.681051
192	-0.736606	0.740753	-0.671778
193	-0.724014	0.749153	-0.662397
194	-0.711423	0.757434	-0.652912
195	-0.698831	0.765595	-0.643323
196	-0.68624	0.773634	-0.633633
197	-0.673648	0.781551	-0.623841
198	-0.661057	0.789344	-0.613951
199	-0.648465	0.797012	-0.603964
200	-0.635873	0.804553	-0.59388
201	-0.623282	0.811967	-0.583703
202	-0.61069	0.819252	-0.573433
203	-0.598099	0.826408	-0.563072
204	-0.585507	0.833432	-0.552622
205	-0.572916	0.840324	-0.542084
206	-0.560324	0.847083	-0.531461
207	-0.547733	0.853707	-0.520753
208	-0.535141	0.860197	-0.509962
209	-0.522549	0.86655	-0.499091
210	-0.509958	0.872765	-0.488141
211	-0.497366	0.878842	-0.477113
212	-0.484775	0.88478	-0.466009
213	-0.472183	0.890577	-0.454832
214	-0.459592	0.896234	-0.443582
215	-0.447	0.901748	-0.432262
216	-0.434409	0.907119	-0.420874
217	-0.421817	0.912347	-0.409419
218	-0.409225	0.917429	-0.397899
219	-0.396634	0.922367	-0.386316
220	-0.384042	0.927158	-0.374671
221	-0.371451	0.931802	-0.362968
222	-0.358859	0.936298	-0.351206
223	-0.346268	0.940646	-0.339389
224	-0.333676	0.944845	-0.327519
225	-0.321085	0.948894	-0.315596
226	-0.308493	0.952792	-0.303623
227	-0.295902	0.95654	-0.291602
228	-0.28331	0.960135	-0.279535
229	-0.270718	0.963579	-0.267424
230	-0.258127	0.96687	-0.25527
231	-0.245535	0.970007	-0.243076
232	-0.232944	0.972991	-0.230843
233	-0.220352	0.975821	-0.218573
234	-0.207761	0.978495	-0.206269
235	-0.195169	0.981015	-0.193932
236	-0.182578	0.983379	-0.181565
237	-0.169986	0.985587	-0.169169
238	-0.157394	0.987639	-0.156745
239	-0.144803	0.989534	-0.144297
240	-0.132211	0.991273	-0.131826
241	-0.11962	0.992854	-0.119335
242	-0.107028	0.994278	-0.106824
243	-0.0944367	0.995544	-0.0942963
244	-0.0818451	0.996653	-0.0817538
245	-0.0692535	0.997603	-0.0691982
246	-0.056662	0.998395	-0.0566317
247	-0.0440704	0.999029	-0.0440562
248	-0.0314789	0.999505	-0.0314737
249	-0.0188873	0.999822	-0.0188862
250	-0.00629578	0.99998	-0.00629574
251	0.00629578	0.99998	0.00629574
252	0.0188873	0.999822	0.0188862
253	0.0314789	0.999505	0.0314737
254	0.0440704	0.999029	0.0440562
255	0.056662	0.998395	0.0566317
256	0.0692535	0.997603	0.0691982
257	0.0818451	0.996653	0.0817538
258	0.0944367	0.995544	0.0942963
259	0.107028	0.994278	0.106824
260	0.11962	0.992854	0.119335
261	0.132211	0.991273	0.131826
262	0.144803	0.989534	0.144297
263	0.157394	0.987639	0.156745
264	0.169986	0.985587	0.169169
265	0.182578	0.983379	0.181565
266	0.195169	0.981015	0.193932
267	0.207761	0.978495	0.206269
268	0.220352	0.975821	0.218573
269	0.232944	0.972991	0.230843
270	0.245535	0.970007	0.243076
271	0.258127	0.96687	0.25527
272	0.270718	0.963579	0.267424
273	0.28331	0.960135	0.279535
274	0.295902	0.95654	0.291602
275	0.308493	0.952792	0.303623
276	0.321085	0.948894	0.315596
277	0.333676	0.944845	0.327519
278	0.346268	0.940646	0.339389
279	0.358859	0.936298	0.351206
280	0.371451	0.931802	0.362968
281	0.384042	0.927158	0.374671
282	0.396634	0.922367	0.386316
283	0.409225	0.917429	0.397899
284	0.421817	0.912347	0.409419
285	0.434409	0.907119	0.420874
286	0.447	0.901748	0.432262
287	0.459592	0.896234	0.443582
288	0.472183	0.890577	0.454832
289	0.484775	0.88478	0.466009
290	0.497366	0.878842	0.477113
291	0.509958	0.872765	0.488141
292	0.522549	0.86655	0.499091
293	0.535141	0.860197	0.509962
294	0.547733	0.853707	0.520753
295	0.560324	0.847083	0.531461
296	0.572916	0.840324	0.542084
297	0.585507	0.833432	0.552622
298	0.598099	0.826408	0.563072
299	0.61069	0.819252	0.573433
300	0.623282	0.811967	0.583703
301	0.635873	0.804553	0.59388
302	0.648465	0.797012	0.603964
303	0.661057	0.789344	0.613951
304	0.673648	0.781551	0.623841
305	0.68624	0.773634	0.633633
306	0.698831	0.765595	0.643323
307	0.711423	0.757434	0.652912
308	0.724014	0.749153	0.662397
309	0.736606	0.740753	0.671778
310	0.749197	0.732236	0.681051
311	0.761789	0.723602	0.690217
312	0.774381	0.714854	0.699273
313	0.786972	0.705993	0.708219
314	0.799564	0.69702	0.717052
315	0.812155	0.687936	0.725772
316	0.824747	0.678743	0.734376
317	0.837338	0.669442	0.742864
318	0.84993	0.660036	0.751234
319	0.862521	0.650525	0.759485
320	0.875113	0.64091	0.767616
321	0.887705	0.631194	0.775625
322	0.900296	0.621378	0.783511
323	0.912888	0.611463	0.791273
324	0.925479	0.601452	0.798909
325	0.938071	0.591345	0.806419
326	0.950662	0.581144	0.813801
327	0.963254	0.570851	0.821053
328	0.975845	0.560468	0.828176
329	0.988437	0.549996	0.835167
330	1.00103	0.539437	0.842026
331	1.01362	0.528792	0.848752
332	1.02621	0.518063	0.855343
333	1.0388	0.507252	0.861798
334	1.05139	0.496361	0.868116
335	1.06399	0.485391	0.874297
336	1.07658	0.474344	0.88034
337	1.08917	0.463222	0.886242
338	1.10176	0.452026	0.892005
339	1.11435	0.440759	0.897626
340	1.12694	0.429422	0.903104
341	1.13954	0.418016	0.908439
342	1.15213	0.406545	0.913631
343	1.16472	0.395009	0.918677
344	1.17731	0.38341	0.923578
345	1.1899	0.371751	0.928332
346	1.20249	0.360033	0.93294
347	1.21508	0.348257	0.937399
348	1.22768	0.336427	0.94171
349	1.24027	0.324543	0.945871
350	1.25286	0.312607	0.949882
351	1.26545	0.300622	0.953743
352	1.27804	0.28859	0.957453
353	1.29063	0.276511	0.961011
354	1.30323	0.264389	0.964416
355	1.31582	0.252225	0.967669
356	1.32841	0.240021	0.970768
357	1.341	0.227779	0.973713
358	1.35359	0.2155	0.976504
359	1.36618	0.203188	0.97914
360	1.37878	0.190843	0.981621
361	1.39137	0.178468	0.983946
362	1.40396	0.166065	0.986115
363	1.41655	0.153636	0.988128
364	1.42914	0.141182	0.989984
365	1.44173	0.128705	0.991683
366	1.45432	0.116209	0.993225
367	1.46692	0.103694	0.994609
368	1.47951	0.091162	0.995836
369	1.4921	0.078616	0.996905
370	1.50469	0.0660575	0.997816
371	1.51728	0.0534886	0.998568
372	1.52987	0.0409111	0.999163
373	1.54247	0.0283272	0.999599
374	1.55506	0.0157388	0.999876
375	1.56765	0.00314788	0.999995
376	1.58024	-0.00944352	0.999955
377	1.59283	-0.0220334	0.999757
378	1.60542	-0.0346199	0.999401
379	1.61801	-0.0472008	0.998885
380	1.63061	-0.0597742	0.998212
381	1.6432	-0.0723382	0.99738
382	1.65579	-0.0848907	0.99639
383	1.66838	-0.0974297	0.995242
384	1.68097	-0.109953	0.993937
385	1.69356	-0.122459	0.992474
386	1.70616	-0.134946	0.990853
387	1.71875	-0.147412	0.989075
388	1.73134	-0.159854	0.987141
389	1.74393	-0.17227	0.98505
390	1.75652	-0.18466	0.982803
391	1.76911	-0.19702	0.9804
392	1.7817	-0.209348	0.977841
393	1.7943	-0.221644	0.975128
394	1.80689	-0.233904	0.97226
395	1.81948	-0.246128	0.969237
396	1.83207	-0.258312	0.966061
397	1.84466	-0.270456	0.962732
398	1.85725	-0.282556	0.959251
399	1.86985	-0.294612	0.955617
400	1.88244	-0.306621	0.951832
401	1.89503	-0.318581	0.947896
402	1.90762	-0.330491	0.943809
403	1.92021	-0.342349	0.939573
404	1.9328	-0.354152	0.935188
405	1.9454	-0.365899	0.930655
406	1.95799	-0.377588	0.925974
407	1.97058	-0.389217	0.921146
408	1.98317	-0.400785	0.916172
409	1.99576	-0.412289	0.911053
410	2.00835	-0.423727	0.90579
411	2.02094	-0.435099	0.900383
412	2.03354	-0.446401	0.894833
413	2.04613	-0.457633	0.889141
414	2.05872	-0.468792	0.883309
415	2.07131	-0.479877	0.877336
416	2.0839	-0.490885	0.871224
417	2.09649	-0.501816	0.864974
418	2.10909	-0.512668	0.858587
419	2.12168	-0.523438	0.852064
420	2.13427	-0.534125	0.845406
421	2.14686	-0.544727	0.838613
422	2.15945	-0.555243	0.831688
423	2.17204	-0.565671	0.824631
424	2.18463	-0.576009	0.817443
425	2.19723	-0.586256	0.810126
426	2.20982	-0.59641	0.80268
427	2.22241	-0.60647	0.795107
428	2.235	-0.616433	0.787407
429	2.24759	-0.626298	0.779583
430	2.26018	-0.636065	0.771636
431	2.27278	-0.64573	0.763566
432	2.28537	-0.655293	0.755375
433	2.29796	-0.664752	0.747064
434	2.31055	-0.674106	0.738635
435	2.32314	-0.683353	0.730088
436	2.33573	-0.692491	0.721426
437	2.34832	-0.70152	0.71265
438	2.36092	-0.710438	0.70376
439	2.37351	-0.719243	0.694759
440	2.3861	-0.727933	0.685648
441	2.39869	-0.736509	0.676428
442	2.41128	-0.744968	0.667101
443	2.42387	-0.753308	0.657668
444	2.43647	-0.761529	0.648131
445	2.44906	-0.76963	0.638491
446	2.46165	-0.777608	0.628749
447	2.47424	-0.785463	0.618909
448	2.48683	-0.793194	0.60897
449	2.49942	-0.800798	0.598934
450	2.51201	-0.808276	0.588803
451	2.52461	-0.815626	0.57858
452	2.5372	-0.822846	0.568264
453	2.54979	-0.829936	0.557858
454	2.56238	-0.836895	0.547364
455	2.57497	-0.84372	0.536783
456	2.58756	-0.850412	0.526117
457	2.60016	-0.856969	0.515368
458	2.61275	-0.86339	0.504537
459	2.62534	-0.869675	0.493626
460	2.63793	-0.875821	0.482636
461	2.65052	-0.881829	0.47157
462	2.66311	-0.887696	0.46043
463	2.67571	-0.893423	0.449216
464	2.6883	-0.899009	0.437931
465	2.70089	-0.904451	0.426577
466	2.71348	-0.909751	0.415155
467	2.72607	-0.914906	0.403667
468	2.73866	-0.919916	0.392115
469	2.75125	-0.92478	0.380501
470	2.76385	-0.929498	0.368827
471	2.77644	-0.934068	0.357094
472	2.78903	-0.938491	0.345305
473	2.80162	-0.942764	0.333461
474	2.81421	-0.946888	0.321564
475	2.8268	-0.950862	0.309616
476	2.8394	-0.954685	0.297619
477	2.85199	-0.958357	0.285574
478	2.86458	-0.961876	0.273485
479	2.87717	-0.965244	0.261352
480	2.88976	-0.968458	0.249178
481	2.90235	-0.971518	0.236964
482	2.91494	-0.974425	0.224712
483	2.92754	-0.977177	0.212425
484	2.94013	-0.979775	0.200105
485	2.95272	-0.982216	0.187752
486	2.96531	-0.984503	0.17537
487	2.9779	-0.986633	0.16296
488	2.99049	-0.988606	0.150524
489	3.00309	-0.990423	0.138065
490	3.01568	-0.992083	0.125583
491	3.02827	-0.993586	0.113082
492	3.04086	-0.994931	0.100562
493	3.05345	-0.996118	0.0880268
494	3.06604	-0.997148	0.0754775
495	3.07863	-0.998019	0.0629162
496	3.09123	-0.998732	0.0503449
497	3.10382	-0.999287	0.0377657
498	3.11641	-0.999683	0.0251804
499	3.129	-0.999921	0.0125912
500	3.14159	-1	-1.36443e-14

## Sheet: XLSTAT_20220907_193551_1_HID
0.240578	0.891963
-0.465453	0.193046
0.828646	-0.285398
-0.0746711	0.629486
0.917087	0.17312

[truncated: 4 more sheets: XLSTAT_20220907_192503_1_HID3, XLSTAT_20220907_192503_1_HID2, XLSTAT_20220907_192503_1_HID1, XLSTAT_20220907_192503_1_HID]
